# Supplementary material for: Prognostic Value of FDG PET/CT in Patients with Nodal Peripheral T-Cell Lymphoma
Source: MDPI journal article supplement (doi:10.3390/diagnostics13172834), 2023-09-01
Supplement: s1 [file s1]

**Table S1.** Number of patients in each Deauville score category at i-PET and e-PET.

|                    |         | End-of-therapy PET |          |         |         |         |           |
|--------------------|---------|--------------------|----------|---------|---------|---------|-----------|
|                    |         | Score 1            | Score 2  | Score 3 | Score 4 | Score 5 | Total     |
| <b>Interim PET</b> | Score 1 | 28                 | 0        | 0       | 0       | 1       | 29 (37%)  |
|                    | Score 2 | 12                 | 10       | 0       | 1       | 1       | 24 (30%)  |
|                    | Score 3 | 1                  | 3        | 2       | 2       | 1       | 9 (11%)   |
|                    | Score 4 | 3                  | 3        | 5       | 2       | 1       | 14 (18%)  |
|                    | Score 5 | 1                  | 1        | 0       | 0       | 1       | 3 (4%)    |
|                    | Total   | 45 (57%)           | 17 (22%) | 7 (9%)  | 5 (6%)  | 5 (6%)  | 79 (100%) |
